# Supplementary material
Source: Springer Nature journal article supplement (http://www.springermedizin.de/resource/supplementary/12885_2012_3408_MOESM2_ESM.pdf/9463278)

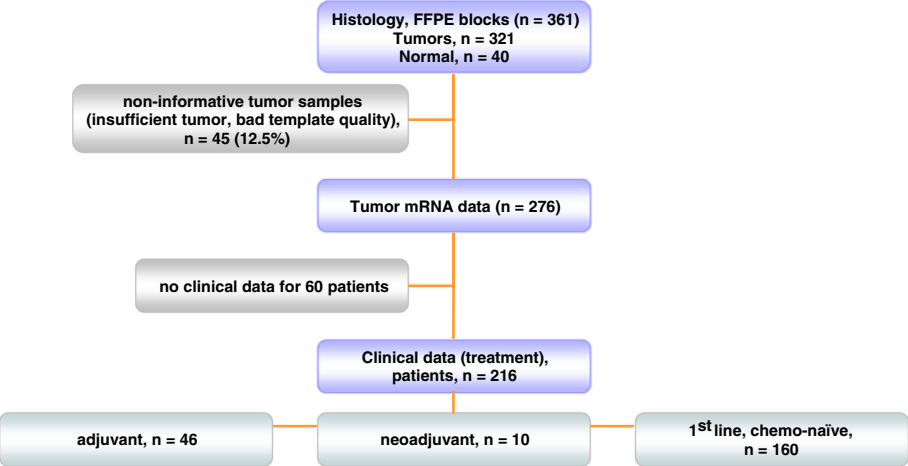

Supplement: MOESM2 [file 9463278]
